# Supplementary material
Source: MDPI journal article supplement (https://www.mdpi.com/2504-446X/7/3/207)
Supplement: s1 [file s1]

# Drone-Based Identification and Monitoring of Two Invasive Alien Plant Species in Open Sand Grasslands by Six RGB Vegetation Indices

László Bakacsy <sup>1,\*</sup>, Zalan Tobak <sup>2</sup>, Boudewijn van Leeuwen <sup>2</sup>, Péter Szilassi <sup>2</sup>, Csaba Biró <sup>3</sup> and József Szatmári <sup>2</sup>

<sup>1</sup> Department of Plant Biology, University of Szeged, Közép Fasor 52, H-6727 Szeged, Hungary

<sup>2</sup> Department of Geoinformatics, Physical and Environmental Geography, University of Szeged, Egyetem utca 2-6, H-6722 Szeged, Hungary

<sup>3</sup> Kiskunság National Park Directorate, Liszt Ferenc utca 19, H-6000 Kecskemét, Hungary

\* Correspondence: bakacsy@bio.u-szeged.hu

## Supplement

**Table S1.** RGB based indices intervals used to generate binary maps and to which species a given index can be applied.

| Indices Intervals        |               | R-G                         | R-B            | G-B      | TGI          | IF                | SSI      |
|--------------------------|---------------|-----------------------------|----------------|----------|--------------|-------------------|----------|
| STAND I.                 | 1.study area  | -37 – 65                    | 2 – 159        | -3 – 123 | -845 – 8240  | 0.416 – 212.5     | 0 – 150  |
|                          | 2.study area  | -32 – 65                    | 0 – 150        | -2 – 137 | -780 – 9105  | 0.333 – 213.524   | 0 – 163  |
|                          | 3.study area  | -47 – 72                    | -3 – 168       | -4 – 132 | -920 – 9110  | -26.479 – 237.628 | 0 – 166  |
|                          | 4.study area  | -46 – 61                    | -7 – 151       | -4 – 127 | -1080 – 8915 | -33.606 – 202.526 | 0 – 164  |
|                          | 5.study area  | -41 – 65                    | 4 – 151        | 0 – 122  | -620 – 8515  | -10.061 – 206.562 | 0 – 159  |
|                          | 6.study area  | -39 – 77                    | -1 – 160       | -3 – 141 | -870 – 9625  | -10.73 – 216.724  | 0 – 175  |
|                          | 7.study area  | -33 – 82                    | 11 – 179       | 1 – 130  | -645 – 8500  | 7 – 260.651       | 0 – 150  |
|                          | 8.study area  | -39 – 66                    | 2 – 135        | -3 – 141 | -875 – 9615  | -20.675 – 184.485 | 0 – 174  |
|                          | 9.study area  | -43 – 75                    | 1 – 165        | -1 – 129 | -565 – 8555  | -3.346 – 238.529  | 0 – 158  |
|                          | 10.study area | -38 – 64                    | 4 – 116        | -6 – 136 | -1060 – 8860 | 0.102 – 155.329   | 0 – 160  |
| STAND II.                | 1.study area  | -59 – 60                    | -1 – 152       | 0 – 137  | -490 – 9310  | -37.656 – 206.494 | 0 – 173  |
|                          | 2.study area  | -53 – 64                    | -3 – 155       | -3 – 139 | -390 – 9740  | -26.545 – 205.526 | 0 – 179  |
|                          | 3.study area  | -44 – 53                    | 1 – 151        | -3 – 126 | -635 – 8540  | -9.218 – 200.677  | 0 – 154  |
|                          | 4.study area  | -40 – 58                    | 15 – 136       | 5 – 132  | -420 – 8780  | -4.817 – 188.485  | 0 – 158  |
|                          | 5.study area  | -51 – 50                    | -12 – 122      | -3 – 98  | -540 – 7455  | -34.736 – 171.521 | 0 – 143  |
|                          | 6.study area  | -46 – 49                    | -6 – 134       | -8 – 116 | -675 – 8185  | -29.642 – 180.543 | 0 – 151  |
|                          | 7.study area  | -37 – 59                    | 10 – 137       | 1 – 125  | -570 – 8435  | 4.419 – 185.464   | 0 – 156  |
|                          | 8.study area  | -40 – 65                    | 11 – 147       | 8 – 136  | -650 – 9385  | -0.081 – 190.628  | 0 – 171  |
|                          | 9.study area  | -47 – 60                    | -3 – 125       | -6 – 135 | -765 – 9325  | -27.614 – 173.455 | 0 – 170  |
|                          | 10.study area | -48 – 45                    | -2 – 136       | -5 – 126 | -700 – 8785  | -36.684 – 178.563 | 0 – 161  |
| Applicability to Species |               | milkweed and blanket flower | blanket flower | milkweed | milkweed     | blanket flower    | milkweed |

**Table S2.** The area of common milkweed shoots area per study areas. The percentages indicate the percentage of overlap between the Index Polygons (R-G, G-B, TGI and SSI Polygons) and the Manual Polygons (M.P.). SD - standard deviation, n = 20.

| Common milkweed shoot AREA |               | M.P.<br>m <sup>2</sup> | R-G Polygons<br>%<br>(M.P.) |        | G-B Polygons<br>%<br>(M.P.) |        | TGI Polygons<br>%<br>(M.P.) |        | SSI Polygons<br>%<br>(M.P.) |        |
|----------------------------|---------------|------------------------|-----------------------------|--------|-----------------------------|--------|-----------------------------|--------|-----------------------------|--------|
| STAND I.                   | 1.study area  | 8.601                  | 8.539                       | 99.28  | 8.563                       | 99.56  | 8.550                       | 99.41  | 8.566                       | 99.59  |
|                            | 2.study area  | 7.594                  | 7.435                       | 97.89  | 7.559                       | 99.53  | 7.596                       | 100.01 | 7.489                       | 98.61  |
|                            | 3.study area  | 8.446                  | 8.560                       | 101.34 | 8.331                       | 98.63  | 8.471                       | 100.29 | 8.414                       | 99.62  |
|                            | 4.study area  | 10.098                 | 9.840                       | 97.45  | 10.322                      | 102.22 | 10.185                      | 100.86 | 10.017                      | 99.19  |
|                            | 5.study area  | 1.984                  | 1.878                       | 94.66  | 2.029                       | 102.27 | 2.021                       | 101.86 | 2.026                       | 102.12 |
|                            | 6.study area  | 16.944                 | 17.073                      | 100.75 | 16.566                      | 97.76  | 16.955                      | 100.06 | 16.954                      | 100.05 |
|                            | 7.study area  | 2.393                  | 2.382                       | 99.52  | 2.291                       | 95.70  | 2.361                       | 98.63  | 2.382                       | 99.51  |
|                            | 8.study area  | 7.596                  | 7.858                       | 103.45 | 7.545                       | 99.32  | 7.641                       | 100.59 | 7.695                       | 101.30 |
|                            | 9.study area  | 9.456                  | 9.219                       | 97.49  | 9.327                       | 98.63  | 9.593                       | 101.45 | 9.399                       | 99.39  |
|                            | 10.study area | 4.232                  | 4.052                       | 95.75  | 4.258                       | 100.63 | 4.237                       | 100.12 | 4.175                       | 98.65  |
| STAND II.                  | 1.study area  | 22.422                 | 23.010                      | 102.62 | 22.743                      | 101.42 | 22.367                      | 99.75  | 22.301                      | 99.45  |
|                            | 2.study area  | 24.573                 | 24.151                      | 98.27  | 24.775                      | 100.81 | 24.550                      | 99.90  | 24.719                      | 100.59 |
|                            | 3.study area  | 11.129                 | 10.963                      | 98.51  | 11.184                      | 100.49 | 11.034                      | 99.15  | 11.092                      | 99.67  |
|                            | 4.study area  | 4.222                  | 4.440                       | 105.16 | 4.292                       | 101.65 | 4.248                       | 100.62 | 4.217                       | 99.87  |
|                            | 5.study area  | 3.200                  | 3.008                       | 94.00  | 3.112                       | 97.26  | 3.130                       | 97.81  | 3.277                       | 102.42 |
|                            | 6.study area  | 5.904                  | 5.768                       | 97.70  | 6.016                       | 101.91 | 6.005                       | 101.71 | 5.846                       | 99.02  |
|                            | 7.study area  | 3.389                  | 3.304                       | 97.48  | 3.480                       | 102.66 | 3.371                       | 99.46  | 3.490                       | 102.98 |
|                            | 8.study area  | 8.088                  | 7.718                       | 95.42  | 7.991                       | 98.79  | 8.176                       | 101.09 | 8.165                       | 100.95 |
|                            | 9.study area  | 13.992                 | 14.112                      | 100.85 | 13.843                      | 98.93  | 13.875                      | 99.16  | 14.105                      | 100.81 |
|                            | 10.study area | 20.889                 | 20.945                      | 100.27 | 21.173                      | 101.36 | 20.739                      | 99.28  | 20.842                      | 99.77  |
| Average %                  |               |                        | 98.89                       |        | 99.98                       |        | 100.06                      |        | 100.18                      |        |
| SD %                       |               |                        | 2.92                        |        | 1.87                        |        | 1.03                        |        | 1.23                        |        |

**Table S3.** The inflorescence area of blanket flower per study areas. The percentage values: Index Polygons (R-G, R-B and IF Polygons) are referred to the Manual Polygons (M.P.). SD - standard deviation, n = 20.

| Blanket flower inflorescence AREA |               | M.P.<br>m <sup>2</sup> | R-G Polygons<br>%<br>(M.P.) |        | R-B Polygons<br>%<br>(M.P.) |        | IF Polygons<br>%<br>(M.P.) |        |
|-----------------------------------|---------------|------------------------|-----------------------------|--------|-----------------------------|--------|----------------------------|--------|
| STAND I.                          | 1.study area  | 1.406                  | 1.377                       | 97.96  | 1.423                       | 101.21 | 1.396                      | 99.31  |
|                                   | 2.study area  | 1.402                  | 1.515                       | 108.09 | 1.411                       | 100.65 | 1.466                      | 104.58 |
|                                   | 3.study area  | 0.899                  | 0.821                       | 91.34  | 0.931                       | 103.48 | 0.880                      | 97.86  |
|                                   | 4.study area  | 1.439                  | 1.315                       | 91.41  | 1.449                       | 100.72 | 1.432                      | 99.50  |
|                                   | 5.study area  | 0.949                  | 0.965                       | 101.71 | 0.930                       | 97.93  | 0.933                      | 98.25  |
|                                   | 6.study area  | 1.445                  | 1.472                       | 101.85 | 1.473                       | 101.88 | 1.434                      | 99.21  |
|                                   | 7.study area  | 5.505                  | 5.638                       | 102.41 | 5.479                       | 99.53  | 5.440                      | 98.82  |
|                                   | 8.study area  | 2.316                  | 2.340                       | 101.01 | 2.399                       | 103.54 | 2.305                      | 99.53  |
|                                   | 9.study area  | 1.706                  | 1.696                       | 99.40  | 1.690                       | 99.05  | 1.716                      | 100.53 |
|                                   | 10.study area | 1.169                  | 1.139                       | 97.39  | 1.167                       | 99.78  | 1.187                      | 101.54 |
| STAND II.                         | 1.study area  | 1.506                  | 1.439                       | 95.59  | 1.459                       | 96.87  | 1.500                      | 99.59  |

|               |       |       |        |       |        |        |        |
|---------------|-------|-------|--------|-------|--------|--------|--------|
| 2.study area  | 1.413 | 1.468 | 103.88 | 1.399 | 99.00  | 1.434  | 101.51 |
| 3.study area  | 0.421 | 0.428 | 101.77 | 0.399 | 94.87  | 0.419  | 99.55  |
| 4.study area  | 1.043 | 0.958 | 91.91  | 1.044 | 100.17 | 1.070  | 102.59 |
| 5.study area  | 0.629 | 0.654 | 103.87 | 0.622 | 98.81  | 0.632  | 100.46 |
| 6.study area  | 0.509 | 0.537 | 105.48 | 0.490 | 96.22  | 0.505  | 99.15  |
| 7.study area  | 1.046 | 1.092 | 104.46 | 1.083 | 103.61 | 1.076  | 102.90 |
| 8.study area  | 0.436 | 0.407 | 93.51  | 0.455 | 104.48 | 0.437  | 100.21 |
| 9.study area  | 0.731 | 0.701 | 95.79  | 0.731 | 99.95  | 0.720  | 98.38  |
| 10.study area | 0.336 | 0.338 | 100.54 | 0.315 | 93.53  | 0.332  | 98.68  |
| Average %     |       | 99.47 |        | 99.76 |        | 100.11 |        |
| SD %          |       | 4.92  |        | 2.92  |        | 1.73   |        |

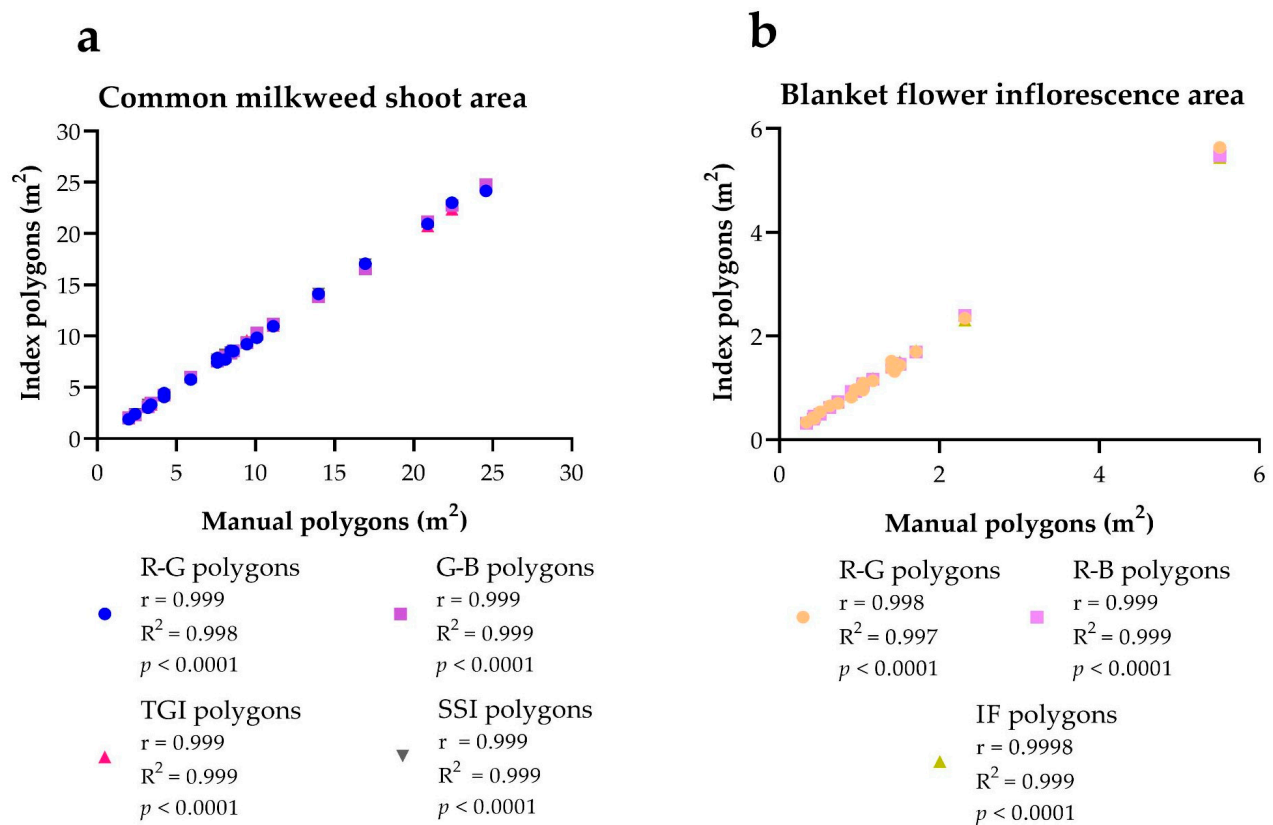

**Figure S1.** The correlation between the Manual Polygons (manually delineated polygons) and Index Polygons in the case of the common milkweed (a) and blanket flower (b). Pearson r correlation (two-tailed) was used, n = 20. Significance was applied from a value of  $p = 0.05$ , values higher than this were not significant.

**Table S4.** The confusion matrix of the classification of milkweed shoots. The overall accuracy, omission error and commission error values were used to evaluate the classification results of the pixels of the remotely sensed images. SD – standard deviation.

| R-G               |                     |                       | G-B               |                     |                       | TGI               |                     |                       | SSI               |                     |                       |
|-------------------|---------------------|-----------------------|-------------------|---------------------|-----------------------|-------------------|---------------------|-----------------------|-------------------|---------------------|-----------------------|
| Overall<br>acc. % | Omission<br>error % | Commission<br>error % | Overall<br>acc. % | Omission<br>error % | Commission<br>error % | Overall<br>acc. % | Omission<br>error % | Commission<br>error % | Overall<br>acc. % | Omission<br>error % | Commission<br>error % |

|                |       |       |       |       |       |       |       |       |       |       |       |       |
|----------------|-------|-------|-------|-------|-------|-------|-------|-------|-------|-------|-------|-------|
| STAND I.       | 99.33 | 48.49 | 36.47 | 99.44 | 42.55 | 28.34 | 99.48 | 40.38 | 25.69 | 99.48 | 40.56 | 25.73 |
| STAND II.      | 99.59 | 34.33 | 33.33 | 99.69 | 26.21 | 25.33 | 99.71 | 24.86 | 23.48 | 99.71 | 25.04 | 24.03 |
| <b>Average</b> | 99.46 | 41.41 | 34.90 | 99.57 | 34.38 | 26.83 | 99.60 | 32.62 | 24.58 | 99.60 | 32.80 | 24.88 |
| <b>SD</b>      | 0.18  | 10.01 | 2.22  | 0.18  | 11.56 | 2.13  | 0.16  | 10.98 | 1.56  | 0.16  | 10.97 | 1.20  |

**Table S5.** The confusion matrix of the classification of blanket flower inflorescence. The overall accuracy, omission error and commission error values were used to evaluate the classification results of the pixels of the remotely sensed images. SD - standard deviation.

|                | <b>R-G</b>            |                         |                           | <b>R-B</b>            |                         |                           | <b>IF</b>             |                         |                           |
|----------------|-----------------------|-------------------------|---------------------------|-----------------------|-------------------------|---------------------------|-----------------------|-------------------------|---------------------------|
|                | <i>Overall acc. %</i> | <i>Omission error %</i> | <i>Commission error %</i> | <i>Overall acc. %</i> | <i>Omission error %</i> | <i>Commission error %</i> | <i>Overall acc. %</i> | <i>Omission error %</i> | <i>Commission error %</i> |
| STAND I.       | 99.80                 | 65.46                   | 52.04                     | 99.79                 | 66.39                   | 54.10                     | 99.82                 | 58.98                   | 43.98                     |
| STAND II.      | 99.95                 | 60.94                   | 60.56                     | 99.95                 | 61.33                   | 60.65                     | 99.96                 | 53.54                   | 53.23                     |
| <b>Average</b> | 99.88                 | 63.20                   | 56.30                     | 99.87                 | 63.86                   | 57.38                     | 99.89                 | 56.26                   | 48.60                     |
| <b>SD</b>      | 0.11                  | 3.20                    | 6.02                      | 0.11                  | 3.58                    | 4.63                      | 0.10                  | 3.85                    | 6.54                      |
